# Supplementary material for: A Network of Field-Calibrated Low-Cost Sensor Measurements of PM2.5 in Lomé, Togo, Over One to Two Years
Source: PubMed Central journal article supplement — ACS Earth Space Chem. 2022 Mar 10;6(4):1011–21. doi: 10.1021/acsearthspacechem.1c00391 (PMC9036579; doi:10.1021/acsearthspacechem.1c00391), 2022-03-10

# Two Years of Field-Calibrated Low-Cost Sensor Measurements of PM<sub>2.5</sub> in Lomé, Togo

## SUPPORTING INFORMATION

### Authors

Garima Raheja<sup>1,2</sup>, Kokou SABI<sup>3</sup>, Hèzouwè SONLA<sup>3</sup>, Eric Kokou GBEDJANGNI<sup>3</sup>, Celeste M. McFarlane<sup>1</sup>, Collins Gameli Hodoli<sup>4</sup>, Daniel M. Westervelt \* <sup>1,5</sup>

1. Lamont-Doherty Earth Observatory of Columbia University, 61 Route 9W, Palisades, NY 10964, USA
2. Department of Earth and Environmental Science, Columbia University, 1200 Amsterdam Avenue, New York, NY 10027 USA
3. Université de Lomé (UL), 01BP: 1515, Lomé-Togo
4. Clean Air One Atmosphere, Accra, Ghana
5. NASA Goddard Institute for Space Studies, 2880 Broadway, New York, NY 10025, USA

\* Corresponding Author Email: [danielmw@ldeo.columbia.edu](mailto:danielmw@ldeo.columbia.edu)

### CONTAINS

**Table S1.** Data Cleaning. Number of data points remaining after each step of data cleaning.

**Figure S1.** Time Averaged Map of Aerosol Optical Depth 550 nm (Deep Blue, Land Only) daily 1 degree resolution from MODIS-Terra MOD08\_D3 v6.1 from 2017-11-01 to 2021-11-01

**Figure S2.** Relative Contributions of Source Sectors to Pollutant Emissions in Lomé, Togo from DICE Africa 2013 Inventory

**Table S1. Data Cleaning. Number of data points remaining after each step of data cleaning.**

| Step # | 0               | 1                   | 2                                                                             | 3                                                              | 4                                                   | 5                            | Final                              |
|--------|-----------------|---------------------|-------------------------------------------------------------------------------|----------------------------------------------------------------|-----------------------------------------------------|------------------------------|------------------------------------|
| Site   | Raw Data Points | After Removing NaNs | After Removing $PM_{2.5} < 0 \mu g m^{-3}$ and $PM_{2.5} > 1000 \mu g m^{-3}$ | After Removing Channel A/B $\Delta PM_{2.5} > 20 \mu g m^{-3}$ | After Removing $RH < 0 \%$ $RH > 100 \%$ $Temp > 0$ | After Removing String Errors | % of Data Points Kept for Analysis |
| OB     | 211495          | 211467              | 211461                                                                        | 209973                                                         | 169136                                              | 169136                       | 79.9%                              |
| DE     | 6674            | 6672                | 6670                                                                          | 6669                                                           | 6669                                                | 6669                         | 99.9%                              |
| UL     | 494902          | 491148              | 491106                                                                        | 490204                                                         | 490204                                              | 490204                       | 99.0%                              |
| AM     | 306902          | 306890              | 305539                                                                        | 283297                                                         | 209297                                              | 209297                       | 68.2%                              |
| AN     | 209619          | 209572              | 209537                                                                        | 209511                                                         | 209511                                              | 209511                       | 99.9%                              |

**Figure S1. Time Averaged Map of Aerosol Optical Depth 550 nm (Deep Blue, Land Only) daily 1 degree resolution from MODIS-Terra MOD08\_D3 v6.1 from 2017-11-01 to 2021-11-01**

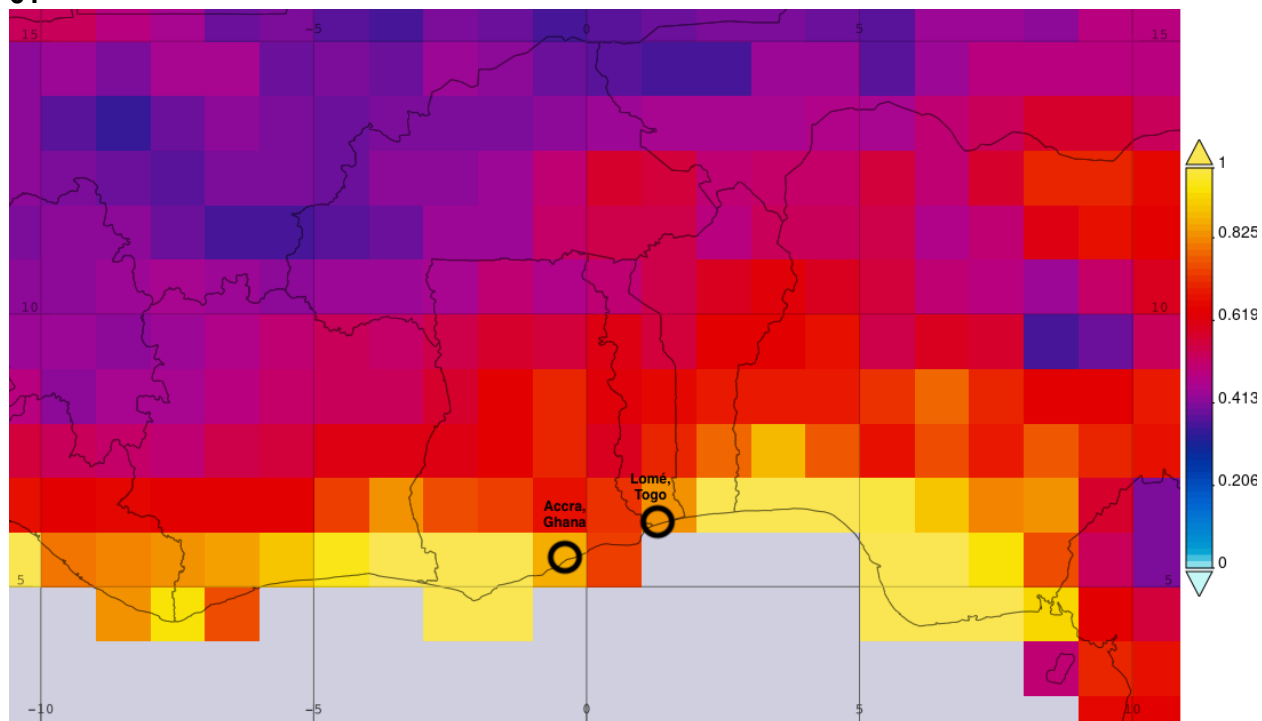

**Figure S2. Relative Contributions of Source Sectors to Pollutant Emissions in Lomé, Togo from DICE Africa 2013 Inventory**

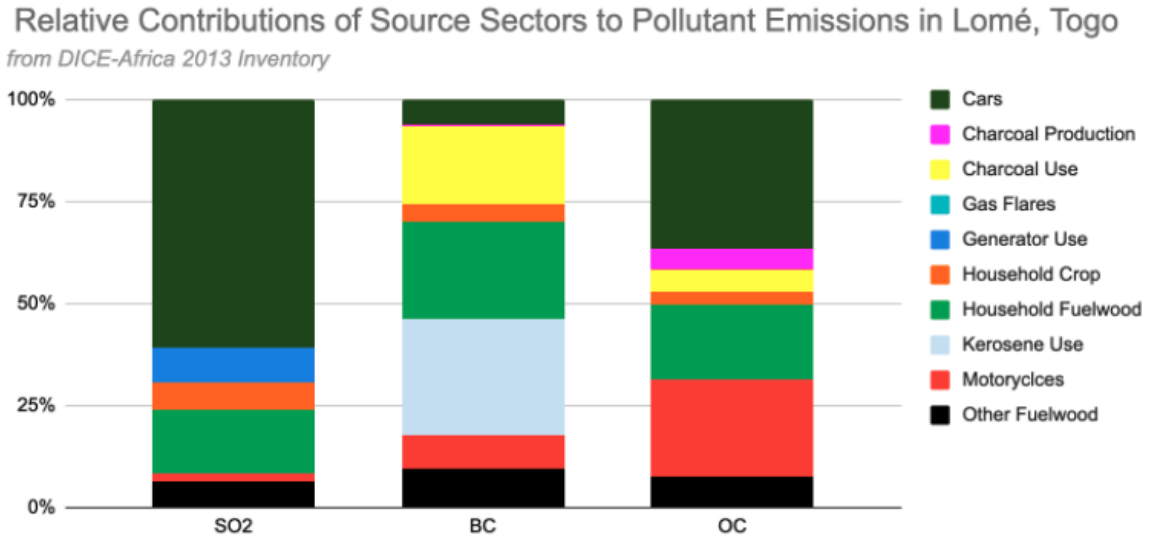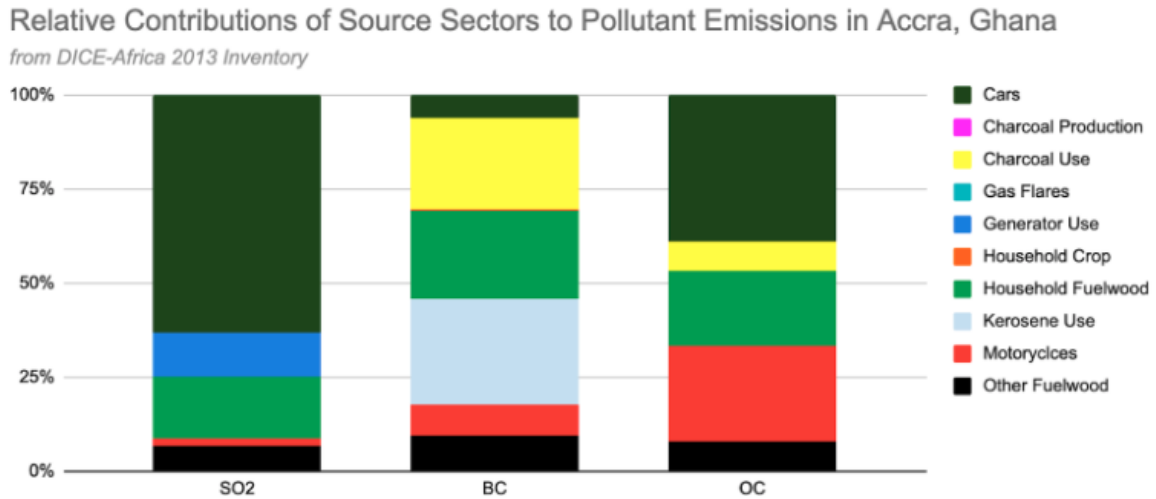

Supplement: sp1c00391_si_001.pdf [file sp1c00391_si_001.pdf]
